# Supplementary material for: Trait-Based Method of Quantitative Assessment of Ecological Functional Groups in the Human Intestinal Microbiome
Source: Biology (Basel). 2023 Jan 11;12(1):115. doi: 10.3390/biology12010115 (PMC9855786; doi:10.3390/biology12010115)
Supplement: Supplementary file 1 [file biology-12-00115-s001.zip]

Archive with 7 entries (7 files):
- Document S1.pdf
- Document S2.zip
- Figure S2.xlsx
- Table S1.xlsx
- Table S2.xlsx
- Table S5.xlsx
- Table S6.xlsx
