# Supplementary material for: Trait-Based Method of Quantitative Assessment of Ecological Functional Groups in the Human Intestinal Microbiome
Source: Biology (Basel). 2023 Jan 11;12(1):115. doi: 10.3390/biology12010115 (PMC9855786; doi:10.3390/biology12010115)
Supplement: Supplementary file 1 [file biology-12-00115-s001.zip › Figure S2.xlsx]

## Sheet: Figure S2
Figure S2. Сomparison of the sets of reads that are taken into account when calculating the abundance of functional groups HumanN and the trait-based method for the F1 diet. But - butyrate-producers, Muc - mucin-decomposing bacteria, Acet - acetogens, Sulf - sulfate-reducers.
To construct Venn diagrams, the SAM files obtained by running the Humann algorithm without translated search were used.
