# Supplementary material for: Trait-Based Method of Quantitative Assessment of Ecological Functional Groups in the Human Intestinal Microbiome
Source: Biology (Basel). 2023 Jan 11;12(1):115. doi: 10.3390/biology12010115 (PMC9855786; doi:10.3390/biology12010115)
Supplement: Supplementary file 1 [file biology-12-00115-s001.zip › Table S1.xlsx]

## Sheet: Table S1
Table S1. The analyzed metatranscriptomic data were taken from [1] and have the following BioProjectID identifiers: SRP092478, SRP092476, SRP092461, SRP092458, and SRP092453.
Project	Archive	Index	Diet
SRP092478	SRR4841988	FR1	fiber-free/fiber-rich
	SRR4841989	FR2
	SRR4841990	FR3
SRP092476	SRR4841891	FP1	prebiotic/fiber-free
	SRR4841892	FP2
	SRR4841893	FP3
SRP092461	SRR4841487	P1	prebiotic
	SRR4841488	P2
	SRR4841489	P3
SRP092458	SRR4841407	F1	fiber-free
	SRR4841408	F2
	SRR4841409	F3
SRP092453	SRR4838357	R1	fiber-rich
	SRR4838358	R2
	SRR4838359	R3
References:
1. Desai, M. S.; Seekatz, A. M.; Koropatkin, N. M.; Kamada, N.; Hickey, C. A.; Wolter, M.; Pudlo, N. A.; Kitamoto, S.; Terrapon, N.; Muller, A.; Young, V. B.; Henrissat, B.; Wilmes, P.; Stappenbeck, T. S.; Núñez, G.; Martens, E. C. A Dietary Fiber-Deprived Gut Microbiota Degrades the Colonic Mucus Barrier and Enhances Pathogen Susceptibility. Cell 2016, 167 (5), 1339-1353.e21. https://doi.org/10.…

## Sheet: Table S2
Table S2. 16S rRNA gene sequence information. Relative abundance of all assigned community members. Information adapted from Table S2A in the Supplementary Materials of [1].
		Mucin-decomposing bacteria				Butyrate-producers				Sulfate-reducers	Acetogens	Unclassified bacteria
Diet	SampleID from Desai et al.	A. municiphila	B. caccae	B. thetaiotaomicron	B. intestihominis	C. symbiosum	E. rectale	F. prausnitzii	R. intestinalis	D. piger	M. formatexigens	B. ovatus	B. uniformis	C. aerofaciens	E. coli	C. rodentium
fiber-free/fiber-rich	Cecal12_pl1	27.4278	13.7855	13.4097	1.44953	3.6984	1.92675	1.21093	4.25316	5.76831	1.30637	5.45216	16.8754	1.07969	2.35624	NA
	Cecal13_pl2	28.2585	12.916	10.46	2.19038	3.35771	2.3281	1.98708	3.15441	5.73171	3.27245	4.35781	15.3654	2.78388	3.83644	NA
	Cecal14_pl2	31.5526	14.2462	12.3324	1.73643	3.89588	3.57862	2.2038	0.361614	4.59182	3.08396	5.43786	12.0697	1.91042	2.99867	NA
	Cecal18_pl2	30.8301	13.9045	10.5952	1.87632	3.19318	0.675647	0	3.48582	5.90438	2.04415	4.37234	17.3473	1.68696	4.084	NA
	Cecal19_pl2	28.3686	17.4706	12.8782	1.61534	4.16963	1.27714	0	0.0133499	6.34567	2.01584	3.20399	14.8318	2.38964	5.42008	NA
	Cecal20_pl2	23.3666	15.8479	13.1146	2.08487	4.04047	0.558155	0.00205204	4.29492	6.51523	2.17106	4.04457	17.861	2.2162	3.88246	NA
	Cecal15_pl2	37.0646	20.3847	5.54843	1.75013	4.19338	0.121296	0	0.745105	5.48952	1.04315	1.39664	16.6418	2.01352	3.60769	NA
	Cecal16_pl2	32.0654	22.0612	6.04943	2.13657	4.23963	0.125681	0	0.381232	6.21282	0.867197	1.6129	18.3661	2.31672	3.56514	NA
	Cecal17_pl2	35.3859	9.71379	9.01995	5.02641	7.19073	0.00394228	0	0.370575	6.25641	1.53355	2.19191	13.8335	2.937	6.53631	NA
fiber-free	Cecal01_pl1	30.6822	20.3591	6.13106	3.29443	5.17056	0	2.02873	0.718133	9.21903	0.466786	2.02873	11.167	2.58528	6.14901	NA
	Cecal02_pl1	35.5932	21.4855	7.50249	3.36491	6.00698	0.249252	1.94417	0.922233	6.97906	1.24626	2.11864	8.47458	0.373878	3.73878	NA
	Cecal04_pl1	28.0611	20.7405	4.60479	1.83436	6.14112	0.100743	0	0	7.88314	0.520505	3.02649	17.5796	1.36003	8.14759	NA
fiber-rich	Cecal05_pl1	16.3484	3.84517	18.8038	1.81175	1.75207	14.6901	2.54924	3.90485	1.90553	3.9219	14.0038	10.2225	0.358087	5.88285	NA
	Cecal06_pl1	16.7585	3.65966	14.2213	1.86113	2.23669	16.4538	3.58037	4.14789	1.74846	1.91537	18.4402	9.85645	0.350526	4.76965	NA
	Cecal07_pl1	21.2373	3.76752	14.5469	2.03974	1.98695	11.6097	0.0335957	3.66193	2.3565	5.32252	15.6316	7.99098	0.163179	9.65156	NA
	Cecal08_pl1	20.9674	4.54614	13.6875	1.8464	2.49962	16.9763	0	4.18743	2.15979	3.41716	15.1374	10.2175	0.45688	3.90047	NA
References:
1. Desai, M. S.; Seekatz, A. M.; Koropatkin, N. M.; Kamada, N.; Hickey, C. A.; Wolter, M.; Pudlo, N. A.; Kitamoto, S.; Terrapon, N.; Muller, A.; Young, V. B.; Henrissat, B.; Wilmes, P.; Stappenbeck, T. S.; Núñez, G.; Martens, E. C. A Dietary Fiber-Deprived Gut Microbiota Degrades the Colonic Mucus Barrier and Enhances Pathogen Susceptibility. Cell 2016, 167 (5), 1339-1353.e21. https://doi.org/10.…
