# Supplementary material for: Trait-Based Method of Quantitative Assessment of Ecological Functional Groups in the Human Intestinal Microbiome
Source: Biology (Basel). 2023 Jan 11;12(1):115. doi: 10.3390/biology12010115 (PMC9855786; doi:10.3390/biology12010115)
Supplement: Supplementary file 1 [file biology-12-00115-s001.zip › Table S5.xlsx]

## Sheet: Table S5
Table S5. Complete scheme of the reconstructed metabolic interaction network. The node/exporter node pair represents a directed interaction, where either the exporter node is a bacterial-produced metabolite, or the node is a food source for the bacterium. This table can be used as an input file for Cytoscape. (https://cytoscape.org)	node	exporter node	node type
	Bo		species
	Bu		species
	Bt	Acetate	species
	Bt	Succinate	species
	Bt	Propionate	species
	Bt	Sulfate	species
	Bt	CO2	species
	Bc	Sulfate	species
	Bar	Sulfate	species
	Ros	Butyrate	species
	Eur	Butyrate	species
	Eur	H2	species
	Eur	CO2	species
	Fpra	Butyrate	species
	Fpra	Lactate	species
	Fpra	Formate	species
	Fpra	CO2	species
	Mfor	Acetate	species
	Csum	Butyrate	species
	Col	Lactate	species
	Col	Formate	species
	Col	H2	species
	Amuc	Acetate	species
	Amuc	Propionate	species
	Amuc	Sulfate	species
	Amuc	1-2-propanediol	species
	Ecol	Acetate	species
	Ecol	Succinate	species
	Ecol	Formate	species
	Ecol	Ethanol	species
	Des	H2S	species
	Mucin	Bt	polysaccharide
	Mucin	Bc	polysaccharide
	Mucin	Bar	polysaccharide
	Mucin	Amuc	polysaccharide
	Pullulan	Bo	polysaccharide
	Pullulan	Bu	polysaccharide
	Pullulan	Bt	polysaccharide
	Pullulan	Ros	polysaccharide
	Pullulan	Eur	polysaccharide
	Glycogen	Bo	polysaccharide
	Glycogen	Bu	polysaccharide
	Glycogen	Bt	polysaccharide
	Glycogen	Ros	polysaccharide
	Glycogen	Eur	polysaccharide
	Glycogen	Mfor	polysaccharide
	Glycogen	Csum	polysaccharide
	Amylopectin (potato)	Bo	polysaccharide
	Amylopectin (potato)	Bu	polysaccharide
	Amylopectin (potato)	Bt	polysaccharide
	Amylopectin (potato)	Ros	polysaccharide
	Amylopectin (potato)	Eur	polysaccharide
	Amylopectin (potato)	Mfor	polysaccharide
	Amylopectin (potato)	Csum	polysaccharide
	Amylopectin (potato)	Col	polysaccharide
	Amylopectin (potato)	Ecol	polysaccharide
	Amylopectin (maize)	Bo	polysaccharide
	Amylopectin (maize)	Bu	polysaccharide
	Amylopectin (maize)	Bt	polysaccharide
	Amylopectin (maize)	Ros	polysaccharide
	Amylopectin (maize)	Eur	polysaccharide
	Amylopectin (maize)	Ecol	polysaccharide
	Inulin	Bo	polysaccharide
	Inulin	Bu	polysaccharide
	Inulin	Bt	polysaccharide
	Inulin	Bc	polysaccharide
	Inulin	Ros	polysaccharide
	Inulin	Eur	polysaccharide
	Inulin	Fpra	polysaccharide
	Inulin	Mfor	polysaccharide
	Levan	Bt	polysaccharide
	Levan	Mfor	polysaccharide
	Levan	Csum	polysaccharide
	Levan	Col	polysaccharide
	Heparin	Bo	polysaccharide
	Heparin	Bt	polysaccharide
	Heparin	Col	polysaccharide
	Hyaluronate	Bo	polysaccharide
	Hyaluronate	Bt	polysaccharide
	Hyaluronate	Bc	polysaccharide
	Chondroitin sulfate	Bo	polysaccharide
	Chondroitin sulfate	Bt	polysaccharide
	Chondroitin sulfate	Bc	polysaccharide
	Chondroitin sulfate	Fpra	polysaccharide
	Polygalacturonate	Bo	polysaccharide
	Polygalacturonate	Bt	polysaccharide
	Polygalacturonate	Bc	polysaccharide
	Ramnogalacturonan	Bo	polysaccharide
	Ramnogalacturonan	Bt	polysaccharide
	Ramnogalacturonan	Bc	polysaccharide
	Pectin galactan (tomato)	Bo	polysaccharide
	Pectin galactan (tomato)	Bu	polysaccharide
	Pectin galactan (tomato)	Bt	polysaccharide
	Pectin galactan (tomato)	Bc	polysaccharide
	Pectin galactan (Lupine)	Bo	polysaccharide
	Pectin galactan (Lupine)	Bu	polysaccharide
	Pectin galactan (Lupine)	Bt	polysaccharide
	Pectin galactan (Lupine)	Bc	polysaccharide
	Arabinogalactan	Bo	polysaccharide
	Arabinogalactan	Bu	polysaccharide
	Arabinogalactan	Bt	polysaccharide
	Arabinogalactan	Bc	polysaccharide
	Arabinogalactan	Mfor	polysaccharide
	Arabinan	Bo	polysaccharide
	Arabinan	Bt	polysaccharide
	Arabinan	Bc	polysaccharide
	Xylan (oats)	Bo	polysaccharide
	Xylan (oats)	Bu	polysaccharide
	Xylan (oats)	Bt	polysaccharide
	Xylan (oats)	Bc	polysaccharide
	Xylan (oats)	Ros	polysaccharide
	Xylan (oats)	Eur	polysaccharide
	Arabinoxylan (wheat)	Bo	polysaccharide
	Arabinoxylan (wheat)	Bt	polysaccharide
	Arabinoxylan (wheat)	Ros	polysaccharide
	Arabinoxylan (wheat)	Eur	polysaccharide
	Galactomannan	Bo	polysaccharide
	Galactomannan	Bu	polysaccharide
	Galactomannan	Ros	polysaccharide
	Glucomannan	Bo	polysaccharide
	Glucomannan	Bu	polysaccharide
	Glucomannan	Ros	polysaccharide
	Xyloglucan	Bo	polysaccharide
	Xyloglucan	Bu	polysaccharide
	Beta glucan	Bo	polysaccharide
	Cellobiose	Bo	polysaccharide
	Cellobiose	Bu	polysaccharide
	Cellobiose	Ros	polysaccharide
	Cellobiose	Eur	polysaccharide
	Cellobiose	Fpra	polysaccharide
	Cellobiose	Mfor	polysaccharide
	Laminarin	Bu	polysaccharide
	Likhenin	Bu	polysaccharide
	Dextran	Bo	polysaccharide
	Dextran	Bu	polysaccharide
	Dextran	Bt	polysaccharide
	Alpha mannan	Bo	polysaccharide
	Alpha mannan	Bt	polysaccharide
	Arabinose	Bo	simple saccharide
	Arabinose	Bu	simple saccharide
	Arabinose	Bt	simple saccharide
	Arabinose	Bc	simple saccharide
	Arabinose	Ros	simple saccharide
	Arabinose	Eur	simple saccharide
	Arabinose	Mfor	simple saccharide
	Arabinose	Csum	simple saccharide
	Arabinose	Ecol	simple saccharide
	Fructose	Bo	simple saccharide
	Fructose	Bu	simple saccharide
	Fructose	Bt	simple saccharide
	Fructose	Bc	simple saccharide
	Fructose	Ros	simple saccharide
	Fructose	Eur	simple saccharide
	Fructose	Fpra	simple saccharide
	Fructose	Mfor	simple saccharide
	Fructose	Csum	simple saccharide
	Fructose	Ecol	simple saccharide
	Fucose	Bo	simple saccharide
	Fucose	Bt	simple saccharide
	Fucose	Bc	simple saccharide
	Fucose	Amuc	simple saccharide
	Fucose	Ecol	simple saccharide
	Galactose	Bo	simple saccharide
	Galactose	Bu	simple saccharide
	Galactose	Bt	simple saccharide
	Galactose	Bc	simple saccharide
	Galactose	Bar	simple saccharide
	Galactose	Ros	simple saccharide
	Galactose	Eur	simple saccharide
	Galactose	Fpra	simple saccharide
	Galactose	Mfor	simple saccharide
	Galactose	Csum	simple saccharide
	Galactose	Col	simple saccharide
	Galactose	Ecol	simple saccharide
	Galacturonic acid	Bo	simple saccharide
	Galacturonic acid	Bu	simple saccharide
	Galacturonic acid	Bt	simple saccharide
	Galacturonic acid	Bc	simple saccharide
	Galacturonic acid	Ros	simple saccharide
	Galacturonic acid	Fpra	simple saccharide
	Galacturonic acid	Mfor	simple saccharide
	Galacturonic acid	Ecol	simple saccharide
	Glucuronic acid	Bo	simple saccharide
	Glucuronic acid	Bu	simple saccharide
	Glucuronic acid	Bt	simple saccharide
	Glucuronic acid	Bc	simple saccharide
	Glucuronic acid	Ros	simple saccharide
	Glucuronic acid	Fpra	simple saccharide
	Glucuronic acid	Col	simple saccharide
	Glucuronic acid	Ecol	simple saccharide
	Glucosamine	Bo	simple saccharide
	Glucosamine	Bu	simple saccharide
	Glucosamine	Bt	simple saccharide
	Glucosamine	Bc	simple saccharide
	Glucosamine	Bar	simple saccharide
	Glucosamine	Ros	simple saccharide
	Glucosamine	Eur	simple saccharide
	Glucosamine	Ecol	simple saccharide
	Glucose	Bo	simple saccharide
	Glucose	Bu	simple saccharide
	Glucose	Bt	simple saccharide
	Glucose	Bc	simple saccharide
	Glucose	Bar	simple saccharide
	Glucose	Ros	simple saccharide
	Glucose	Eur	simple saccharide
	Glucose	Fpra	simple saccharide
	Glucose	Mfor	simple saccharide
	Glucose	Csum	simple saccharide
	Glucose	Ecol	simple saccharide
	Mannose	Bo	simple saccharide
	Mannose	Bu	simple saccharide
	Mannose	Bt	simple saccharide
	Mannose	Bc	simple saccharide
	Mannose	Bar	simple saccharide
	Mannose	Ros	simple saccharide
	Mannose	Mfor	simple saccharide
	Mannose	Csum	simple saccharide
	Mannose	Col	simple saccharide
	Mannose	Ecol	simple saccharide
	N-acetylglucosamine	Bo	simple saccharide
	N-acetylglucosamine	Bu	simple saccharide
	N-acetylglucosamine	Bt	simple saccharide
	N-acetylglucosamine	Bc	simple saccharide
	N-acetylglucosamine	Bar	simple saccharide
	N-acetylglucosamine	Ros	simple saccharide
	N-acetylglucosamine	Eur	simple saccharide
	N-acetylglucosamine	Fpra	simple saccharide
	N-acetylglucosamine	Csum	simple saccharide
	N-acetylglucosamine	Col	simple saccharide
	N-acetylglucosamine	Amuc	simple saccharide
	N-acetylglucosamine	Ecol	simple saccharide
	N-acetylgalactosamine	Bo	simple saccharide
	N-acetylgalactosamine	Bu	simple saccharide
	N-acetylgalactosamine	Bt	simple saccharide
	N-acetylgalactosamine	Bc	simple saccharide
	N-acetylgalactosamine	Bar	simple saccharide
	N-acetylgalactosamine	Col	simple saccharide
	N-acetylgalactosamine	Amuc	simple saccharide
	N-acetylgalactosamine	Ecol	simple saccharide
	N-acetylneuraminic acid	Bc	simple saccharide
	N-acetylneuraminic acid	Fpra	simple saccharide
	N-acetylneuraminic acid	Mfor	simple saccharide
	N-acetylneuraminic acid	Csum	simple saccharide
	N-acetylneuraminic acid	Col	simple saccharide
	Ramnose	Bo	simple saccharide
	Ramnose	Bt	simple saccharide
	Ramnose	Bc	simple saccharide
	Ramnose	Bar	simple saccharide
	Ramnose	Col	simple saccharide
	Ramnose	Ecol	simple saccharide
	Ribose	Bo	simple saccharide
	Ribose	Bu	simple saccharide
	Ribose	Bt	simple saccharide
	Ribose	Bc	simple saccharide
	Ribose	Csum	simple saccharide
	Ribose	Col	simple saccharide
	Ribose	Ecol	simple saccharide
	Xylose	Bo	simple saccharide
	Xylose	Bu	simple saccharide
	Xylose	Bt	simple saccharide
	Xylose	Bc	simple saccharide
	Xylose	Ros	simple saccharide
	Xylose	Eur	simple saccharide
	Xylose	Col	simple saccharide
	Xylose	Ecol	simple saccharide
	Acetate	Eur	metabolite
	Acetate	Fpra	metabolite
	Succinate		metabolite
	Propionate		metabolite
	Butyrate		metabolite
	Lactate	Des	metabolite
	Formate	Des	metabolite
	Sulfate	Des	metabolite
	1-2-propanediol		metabolite
	Ethanol	Bt	metabolite
	H2	Des	metabolite
	CO2	Mfor	metabolite
	H2S	Mfor	metabolite
