# Supplementary material for: Trait-Based Method of Quantitative Assessment of Ecological Functional Groups in the Human Intestinal Microbiome
Source: Biology (Basel). 2023 Jan 11;12(1):115. doi: 10.3390/biology12010115 (PMC9855786; doi:10.3390/biology12010115)
Supplement: Supplementary file 1 [file biology-12-00115-s001.zip › Table S6.xlsx]

## Sheet: Table S6
Table S6. The results of the HUMAnN 3 alignments for the reads that were not taken into account by this method in assessing the abundance of TDGF, but which were taken into account in the developed method. * - unaligment ** - annotation not found But - butyrate-producers, Muc - mucin-decomposing bacteria, Acet - acetogens, Sulf - sulfate-reducers. The tables show results for the F1 diet only.
identifier	number of reads	annotation
Sulfat
UniRef50_P45574|UniRef90_G1UUT3	2432	Cluster: Dissimilatory-type sulfite reductase subunit alpha
*	1344
UniRef50_P45575|UniRef90_B8IZA0	939	Cluster: Sulfite reductase, dissimilatory-type beta subunit
UniRef50_A0A1K1LJV8|UniRef90_A0A1K1LJV8	361	Cluster: Uncharacterized protein
UniRef50_B6WUZ6|UniRef90_B6WUZ6	263	Cluster: Putative sulfite reductase, dissimilatory-type alpha subunit (Fragment)
UniRef50_Q46582|UniRef90_B6WUZ3	240	Cluster: Protein DsvD
UniRef50_B6WV02|UniRef90_B6WV02	82	Cluster: NIR_SIR domain-containing protein
UniRef50_P45574|UniRef90_P45574	25	Cluster: Sulfite reductase, dissimilatory-type subunit alpha
Acet
*	1257
UniRef50_A0A0L6U1L4|UniRef90_C6LCL0	1088	Cluster: CO-methylating acetyl-CoA synthase
UniRef50_A0A0M1UZ03|UniRef90_C6LCK8	470	Cluster: CO dehydrogenase/acetyl-CoA synthase delta subunit
UniRef50_A0A0B3VNJ8|UniRef90_A0A174VIY2	466	**
UniRef50_R6CG06|UniRef90_C6LCK9	375	Cluster: Corrinoid/iron-sulfur protein small subunit
UniRef50_F4LVG2|UniRef90_C6LCL1	292	Cluster: CobQ/CobB/MinD/ParA nucleotide binding domain protein
UniRef50_U2DGT4|UniRef90_C6LCL3	244	Cluster: CobQ/CobB/MinD/ParA nucleotide binding domain protein
UniRef50_F5YD84|UniRef90_C6LCK6	105	Cluster: 2Fe-2S iron-sulfur cluster binding domain protein
UniRef50_C6LCL6|UniRef90_C6LCL6	65	Cluster: Uncharacterized protein
UniRef50_A0A0J1J992|UniRef90_C6LCL4	54	Cluster: Uncharacterized protein
UniRef50_C6LCL5|UniRef90_C6LCL5	39	Cluster: Uncharacterized protein
UniRef50_C6LCK5|UniRef90_C6LCK5	19	Cluster: DUF3786 domain-containing protein
But
UniRef50_P45867|UniRef90_A0A1E3APG6	1241	Cluster: Acyl-CoA dehydrogenase, short-chain specific
UniRef50_Q9BWD1-2|UniRef90_U2C7M5	958	Cluster: Acetyl-CoA C-acetyltransferase
UniRef50_R6F3W6|UniRef90_E7GR55	932	Cluster: ETF domain-containing protein
*	817
UniRef50_H6LGM7|UniRef90_A0A174KTW7	763	Cluster: Electron transfer flavoprotein subunit beta
UniRef50_P45364|UniRef90_E7GR52	514	Cluster: 3-hydroxyacyl-CoA dehydrogenase
UniRef50_Q8CAY6|UniRef90_A0A173ZXA8	439	**
UniRef50_P52046|UniRef90_U2BPG1	412	Cluster: Enoyl-CoA hydratase
UniRef50_C0B8K0|UniRef90_C0B8K0	370	Cluster: 3-hydroxyacyl-CoA dehydrogenase
UniRef50_A0A1D8GGD0|UniRef90_A0A174AXJ6	361	Cluster: Electron transfer flavoprotein subunit alpha
UniRef50_P45867|UniRef90_R6P081	245	Cluster: Acyl-CoA dehydrogenase, short-chain specific
UniRef50_Q06319|UniRef90_E7GR42	237	Cluster: Acyl-CoA dehydrogenase domain-containing protein
UniRef50_P52046|UniRef90_A8SFP0	119	Cluster: 3-hydroxybutyryl-CoA dehydratase
UniRef50_C0B8K0|UniRef90_D4JZK1	118	Cluster: 3-hydroxybutyryl-CoA dehydrogenase
UniRef50_R5DAP7|UniRef90_E7GP99	110	Cluster: Flavodoxin
UniRef50_Q06319|UniRef90_A0A2A6ZHP7	106	Cluster: Acyl-CoA dehydrogenase
UniRef50_A0A085NWY6|UniRef90_A0A174K8Y3	94	Cluster: Acetoacetyl-COA transferase subunit alpha
UniRef50_A0A160V0H9|UniRef90_E7GR45	77	Cluster: 3-hydroxybutyryl-CoA dehydratase
UniRef50_A0A174XXL8|UniRef90_E7GR43	71	Cluster: Uncharacterized protein
UniRef50_R6F3W6|UniRef90_E2ZH42	65	Cluster: Electron transfer flavoprotein FAD-binding domain protein
UniRef50_H6LGM7|UniRef90_A0A1Q6QPE6	31	**
UniRef50_H6LGM7|UniRef90_A0A2A7B772	23	Cluster: Electron transfer flavoprotein beta subunit/FixA family protein
UniRef50_Q9BWD1-2|UniRef90_A0A173R2N2	18	Cluster: Acetyl-CoA C-acetyltransferase
UniRef50_U2BPG5|UniRef90_U2BPG5	16	Cluster: Uncharacterized protein
UniRef50_U2DK08|UniRef90_U2DK08	11	Cluster: Uncharacterized protein (Fragment)
UniRef50_G5FC75|UniRef90_G5FC75	4	Cluster: Uncharacterized protein
UniRef50_U2CYT8|UniRef90_U2CYT8	1	Cluster: Uncharacterized protein
UniRef50_U2DAC0|UniRef90_U2DAC0	1	Cluster: Uncharacterized protein
Muc
UniRef50_W4PGH6|UniRef90_R6DEW8	9167	Cluster: SusC/RagA family TonB-linked outer membrane protein
*	8511
UniRef50_A0A0N7I9C5|UniRef90_R5UUI6	5191	Cluster: RagB/SusD domain protein
UniRef50_A0A0P0EUP1|UniRef90_R5U2W5	3027	Cluster: Carbohydrate-binding protein
UniRef50_R5UMJ9|UniRef90_R5UMJ9	2359	Cluster: F5/8 type C domain-containing protein
UniRef50_R7DKX9|UniRef90_C3R0E9	1939	Cluster: Tyrosine recombinase XerC
UniRef50_U2MIA3|UniRef90_R6JDC9	1229	Cluster: Tyrosine recombinase XerC
UniRef50_R6J4Z3|UniRef90_R6J4Z3	1218	Cluster: Uncharacterized protein
UniRef50_A6KYY1|UniRef90_R5UTZ5	1044	Cluster: Gfo/Idh/MocA family oxidoreductase
UniRef50_R6D7E0|UniRef90_R5UU00	908	Cluster: Outer membrane cobalamin receptor protein
UniRef50_B2UL75|UniRef90_B2UL75	777	Cluster: Glycosyl hydrolase family 109 protein 1
UniRef50_A6KYY1|UniRef90_Q89ZX8	683	Cluster: Glycosyl hydrolase family 109 protein 1
UniRef50_A0A396B7T3|UniRef90_R5U8X3	644	Cluster: Peptidase M60 domain-containing protein
UniRef50_F9D155|UniRef90_R5U833	508	Cluster: Aminopeptidase P family protein
UniRef50_B2URG9|UniRef90_B2URG9	493	Cluster: Cell division regulator GpsB
UniRef50_U7UDF4|UniRef90_R5U9D6	493	Cluster: RagB/SusD domain protein
UniRef50_R5UQL2|UniRef90_R5UQL2	482	Cluster: Histidine kinase
UniRef50_D1PZN9|UniRef90_R6JN28	477	Cluster: Sigma-54 modulation protein
UniRef50_A0A1C7PEQ3|UniRef90_R6J0W7	412	Cluster: Protein translocase subunit SecA
UniRef50_A0A1C7PA97|UniRef90_A0A2N8I3Q0	403	Cluster: Uncharacterized protein
UniRef50_R5UG22|UniRef90_R5UG22	391	Cluster: Chitobiase
UniRef50_A0A3F3KFT7|UniRef90_A0A3F3KFT7	349	**
UniRef50_A0A2N8IQV7|UniRef90_A0A2N8IQV7	348	Cluster: Uncharacterized protein
UniRef50_A0A139TM65|UniRef90_A0A2N8J131	347	**
UniRef50_B2UL75|UniRef90_B2UQL7	329	Cluster: Glycosyl hydrolase family 109 protein 2
UniRef50_A0A2N8HJW1|UniRef90_A0A2N8IB22	326	Cluster: DNA polymerase III subunit gamma/tau
UniRef50_A7UZU6|UniRef90_A7UZU6	324	Cluster: Uncharacterized protein
UniRef50_R5U9S9|UniRef90_R5U9S9	291	Cluster: Anti-sigma factor
UniRef50_A0A1H6KFQ4|UniRef90_A0A139TQ71	283	Cluster: Pyrophosphate phospho-hydrolase
UniRef50_Q5L883|UniRef90_E6SRA0	274	Cluster: Glutamate--tRNA ligase
UniRef50_A6KYY1|UniRef90_A0A3E4QTB3	259	Cluster: Gfo/Idh/MocA family oxidoreductase
UniRef50_R7E343|UniRef90_R7E343	247	Cluster: Aconitate hydratase
UniRef50_A0A2N8IQ25|UniRef90_A0A2N8IQ25	233	Cluster: Ribonuclease R
UniRef50_R6K1T0|UniRef90_R7DXZ1	226	Cluster: ATP-dependent DNA helicase RecG
UniRef50_B2UL69|UniRef90_B2UL69	207	Cluster: DNA ligase
UniRef50_K9EA01|UniRef90_A0A139L5M6	207	Cluster: 3-deoxy-D-manno-octulosonic acid transferase
UniRef50_A0A139TP82|UniRef90_R6IXL2	205	Cluster: DUF4340 domain-containing protein
UniRef50_A0A2N8HDV3|UniRef90_A0A2N8IQW9	188	Cluster: ATP-dependent helicase
UniRef50_A0A2N8HDT1|UniRef90_A0A2N8HDT1	187	Cluster: ABC_transp_aux domain-containing protein
UniRef50_Q5LGW9|UniRef90_R5U2Q4	185	Cluster: Gfo/Idh/MocA family oxidoreductase
UniRef50_A0A1C2BRM7|UniRef90_A0A3E4I971	183	Cluster: DUF4965 domain-containing protein
UniRef50_A6GYV0|UniRef90_R6KAH4	171	Cluster: 30S ribosomal protein S21
UniRef50_R6D7E0|UniRef90_R6UV39	168	Cluster: SusC/RagA family protein
UniRef50_U7UK38|UniRef90_A0A139JX62	168	Cluster: 7TM receptor with intracellular HD hydrolase
UniRef50_A0A396B7T3|UniRef90_R5V0Z9	167	Cluster: Peptidase M60 domain-containing protein
UniRef50_A0A133XRB3|UniRef90_K5CBL1	165	Cluster: Carbonic anhydrases/acetyltransferases, isoleucine patch superfamily
UniRef50_D1PZN9|UniRef90_A0A3E4FWR1	160	Cluster: Putative sigma-54 modulation protein
UniRef50_B5CZW0|UniRef90_A5ZF33	155	Cluster: Uncharacterized protein
UniRef50_A0A016BS44|UniRef90_A0A078RVE2	154	Cluster: Sigma 54 modulation / S30EA ribosomal family protein
UniRef50_B5CZV9|UniRef90_R5U5W6	154	Cluster: Peptidase M60 domain-containing protein
UniRef50_A0A2N8ICK6|UniRef90_A0A2N8ICK6	153	Cluster: Uncharacterized protein
UniRef50_A0A1Y1CUL0|UniRef90_A0A2N8HY19	150	Cluster: Multidrug efflux RND transporter permease subunit
UniRef50_A7V674|UniRef90_A7V674	149	Cluster: Uncharacterized protein
UniRef50_R6JD31|UniRef90_R6JD31	149	Cluster: Uroporphyrinogen-III C-methyltransferase
UniRef50_A5ZG44|UniRef90_R6UYM8	147	Cluster: RNA polymerase ECF-type sigma factor
UniRef50_B2URG6|UniRef90_B2URG6	147	Cluster: Endo/exonuclease/phosphatase domain-containing protein
UniRef50_R7LCZ8|UniRef90_R6UV36	144	Cluster: DUF2179 domain-containing protein
UniRef50_L1PST9|UniRef90_B2UQK3	142	Cluster: Multifunctional fusion protein
UniRef50_A0A3F3KAF7|UniRef90_A0A3F3KAF7	141	**
UniRef50_A0A2N8HIG5|UniRef90_A0A2N8HIG5	139	Cluster: ABC-ATPase UvrA
UniRef50_R7E5N7|UniRef90_R6J0Y9	139	Cluster: Metabolite traffic protein EboE
UniRef50_A0A073ICU6|UniRef90_A0A174JJK5	137	**
UniRef50_A0A2N8HJR2|UniRef90_R6JFF3	136	Cluster: Peptidase M60 domain-containing protein
UniRef50_U7UDF4|UniRef90_C6ILB2	135	Cluster: SusD family protein
UniRef50_A0A2N8HAM4|UniRef90_R6JYI1	132	Cluster: FolC bifunctional protein
UniRef50_A0A2N8HXJ7|UniRef90_A0A2N8HXJ7	130	Cluster: Oxidoreductase
UniRef50_D4TEM3|UniRef90_A0A2N8IIS1	129	**
UniRef50_A0A2N8HDV3|UniRef90_UPI000B39DE6D	122	**
UniRef50_A5ZG44|UniRef90_A5ZG44	120	Cluster: RNA polymerase sigma-70 factor
UniRef50_B2URF7|UniRef90_B2URF7	118	Cluster: Uncharacterized protein
UniRef50_A0A2N8HJV8|UniRef90_A0A2N8HJV8	115	Cluster: Uncharacterized protein
UniRef50_A0A139TTZ3|UniRef90_A0A2N8IQ36	112	Cluster: LysR family transcriptional regulator
UniRef50_E6K6E4|UniRef90_A0A3E4FXC6	109	Cluster: Ser/Thr phosphatase family protein
UniRef50_R6KJU1|UniRef90_A0A0P0FDL1	106	Cluster: Lactase
UniRef50_A0A1H6L3U3|UniRef90_A0A2N8HAJ9	105	Cluster: DNA topoisomerase
UniRef50_A0A2N8HMR0|UniRef90_A0A2N8HZ70	102	Cluster: RNA polymerase sigma-54 factor
UniRef50_E6SQ24|UniRef90_A0A0P0EVH7	102	Cluster: Peptidase M60 domain-containing protein
UniRef50_R7DU72|UniRef90_A0A2N8HWA5	100	**
UniRef50_A0A1H6M7P5|UniRef90_A0A139TPA9	98	Cluster: Uncharacterized protein
UniRef50_A0A2N8HK23|UniRef90_A0A2N8IB05	96	Cluster: TonB_C domain-containing protein
UniRef50_E5VBD2|UniRef90_E5VBD2	96	Cluster: SusC/RagA family TonB-linked outer membrane protein
UniRef50_A0A2N8I791|UniRef90_A0A2N8I791	94	Cluster: Corrinoid adenosyltransferase
UniRef50_R7P8X0|UniRef90_E5VBD6	94	Cluster: Glycoside hydrolase family 3 C-terminal domain-containing protein
UniRef50_A0A139TM68|UniRef90_R6J0T8	89	Cluster: 3-dehydroquinate synthase
UniRef50_A0A2N8HIG5|UniRef90_A0A2N8HD30	89	Cluster: ABC-ATPase UvrA
UniRef50_I9JHR7|UniRef90_R5USQ2	87	Cluster: Thioredoxin domain-containing protein
UniRef50_R7H225|UniRef90_B0NW72	87	Cluster: Glycoside hydrolase family 125 protein
UniRef50_A0A2N8HZ87|UniRef90_R7E6V6	86	Cluster: Bifunctional chorismate mutase/prephenate dehydratase
UniRef50_R5UN39|UniRef90_A5ZG29	86	Cluster: Uncharacterized protein
UniRef50_A0A139KHP9|UniRef90_A0A139KHP9	84	Cluster: Antioxidant, AhpC/TSA family
UniRef50_A0A139TPI9|UniRef90_A0A2N8IQV5	83	Cluster: SGNH_hydro domain-containing protein
UniRef50_Q8Z810|UniRef90_R6J5R9	83	Cluster: Major facilitator superfamily MFS_1
UniRef50_R7E4Q0|UniRef90_R7E4Q0	83	Cluster: RNA-splicing ligase RtcB
UniRef50_R6J5L0|UniRef90_A0A2N8IQ11	82	Cluster: Autotransporter domain-containing protein
UniRef50_R6J5L8|UniRef90_A0A139TTX9	82	Cluster: N-acetylmuramoyl-L-alanine amidase CwlH
UniRef50_R6E7T7|UniRef90_A5ZG38	81	Cluster: Anti-sigma factor
UniRef50_A0A2N8HZ31|UniRef90_A0A2N8HZ31	80	Cluster: Uncharacterized protein
UniRef50_L0FU49|UniRef90_B0NW80	79	Cluster: TonB-linked outer membrane protein, SusC/RagA family
UniRef50_A0A2N8IIU4|UniRef90_A0A2N8IIU4	78	**
UniRef50_A0A0N7Z542|UniRef90_A0A139TPC1	77	Cluster: ABC transporter related
UniRef50_A0A139TPI6|UniRef90_A0A139TPI6	76	Cluster: Pseudouridine synthase (Fragment)
UniRef50_A0A2N8IXC2|UniRef90_A0A2N8IXC2	76	Cluster: Amino-acid acetyltransferase
UniRef50_A0A2N8HXF2|UniRef90_A0A2N8HXF2	73	Cluster: Uncharacterized protein
UniRef50_E5C9N9|UniRef90_A0A174R1M0	73	Cluster: DUF229 domain-containing protein
UniRef50_A0A078RXR8|UniRef90_A0A078RXR8	72	Cluster: Xyloglucanase Xgh74A
UniRef50_A0A2N8HAK2|UniRef90_UPI000C9A7CF9	71	Cluster: Uncharacterized protein
UniRef50_A0A2N8ICL5|UniRef90_A0A2N8IQ14	70	Cluster: Uncharacterized protein
UniRef50_R7KST3|UniRef90_R7KST3	70	Cluster: Carboxypeptidase regulatory-like domain protein
UniRef50_A0A174T0G2|UniRef90_A0A174T0G2	68	Cluster: Alpha-1,2-mannosidase
UniRef50_A0A3F3KBL4|UniRef90_A0A3F3KBL4	68	**
UniRef50_R6JD36|UniRef90_R6JD36	67	Cluster: Uncharacterized protein
UniRef50_A0A139TP80|UniRef90_A0A2N8IJ11	66	**
UniRef50_A0A2N8IQV9|UniRef90_R6JYI9	66	Cluster: Nif3-like dinuclear metal center hexameric protein
UniRef50_Q89ZX6|UniRef90_Q89ZX6	66	Cluster: DUF1735 domain-containing protein
UniRef50_A0A2N8IZ90|UniRef90_A0A2N8IZ90	64	**
UniRef50_A0A2N8ILN6|UniRef90_A0A2N8ILN6	60	Cluster: OPT/YSL family transporter
UniRef50_R6L3G7|UniRef90_A0A374MQP0	60	Cluster: Uncharacterized protein
UniRef50_F4CBY0|UniRef90_A0A174QXP9	59	Cluster: Arylsulfatase
UniRef50_A0A2N8HMQ8|UniRef90_A0A2N8HMQ8	58	Cluster: CDP-diacylglycerol--glycerol-3-phosphate 3-phosphatidyltransferase
UniRef50_Q5LGW9|UniRef90_K0X191	56	Cluster: GFO_IDH_MocA domain-containing protein
UniRef50_R6MAF9|UniRef90_A0A174JVZ7	55	Cluster: Hydrolase
UniRef50_W6TJ38|UniRef90_A0A174T6Q0	55	Cluster: Glycoside hydrolase family 92 protein
UniRef50_A0A174T597|UniRef90_A0A174T597	50	Cluster: Alpha-1,2-mannosidase
UniRef50_A0A2N8HAK2|UniRef90_A0A2N8ICK3	50	Cluster: Uncharacterized protein
UniRef50_A0A2N8HLQ8|UniRef90_A0A2N8HLQ8	50	Cluster: 3-dehydroquinate synthase
UniRef50_A6KYY1|UniRef90_A0A174CLT3	49	Cluster: Gfo/Idh/MocA family oxidoreductase
UniRef50_A0A139TPG0|UniRef90_A0A2N8IQX5	48	Cluster: NUDIX hydrolase
UniRef50_A0A139TUM7|UniRef90_A0A2N8IWS3	48	**
UniRef50_A0A139TP71|UniRef90_A0A2N8IQX1	47	Cluster: Chromosomal replication initiator protein DnaA
UniRef50_A0A2N8IZD8|UniRef90_A0A2N8IZD8	47	**
UniRef50_A0A2N8HY05|UniRef90_A0A2N8I788	45	Cluster: Uncharacterized protein
UniRef50_D5BAK3|UniRef90_B0NW76	45	Cluster: Uncharacterized protein
UniRef50_B2URG7|UniRef90_B2URG7	44	Cluster: Nucleoid-associated protein Amuc_1227
UniRef50_A0A139LTJ3|UniRef90_A7V669	43	Cluster: Gfo/Idh/MocA family oxidoreductase
UniRef50_G8UKL1|UniRef90_A0A3E5EDQ6	43	Cluster: Anti-sigma factor
UniRef50_A0A132HZK0|UniRef90_A0A174QY42	42	Cluster: Aldose 1-epimerase
UniRef50_A0A2N8IIU4|UniRef90_A0A2N8I796	42	Cluster: Uncharacterized protein
UniRef50_K9EA01|UniRef90_K9EA01	41	Cluster: 3-deoxy-D-manno-octulosonic acid transferase
UniRef50_A0A174FEB8|UniRef90_A0A174FEB8	39	Cluster: Uncharacterized protein
UniRef50_Q8A353|UniRef90_Q8A353	39	Cluster: RagB/SusD family nutrient uptake outer membrane protein
UniRef50_A0A2N8HFP6|UniRef90_A0A2N8I0T9	38	Cluster: Pseudouridine synthase (Fragment)
UniRef50_A0A139TTZ7|UniRef90_A0A139TTZ7	37	Cluster: MFS domain-containing protein
UniRef50_A0A139KHG2|UniRef90_A0A139KHG2	36	Cluster: Uncharacterized protein
UniRef50_A0A2N8IWT9|UniRef90_A0A2N8IWT9	35	**
UniRef50_R7E3N8|UniRef90_R6K2Q5	35	Cluster: Zinc metallopeptidase
UniRef50_E4VPV7|UniRef90_A0A396FA40	34	Cluster: Arabinan endo-1,5-alpha-L-arabinosidase
UniRef50_E5VBE0|UniRef90_E5VBE0	34	Cluster: Anaerobic sulfatase-maturation protein
UniRef50_A0A0J9I9H7|UniRef90_A0A374MWU4	32	Cluster: Carboxypeptidase regulatory-like domain-containing protein
UniRef50_A0A354E852|UniRef90_A0A354E852	32	Cluster: Uncharacterized protein
UniRef50_A0A2N8I3N6|UniRef90_A0A2N8I3N6	31	Cluster: Uncharacterized protein
UniRef50_E6MT58|UniRef90_A0A374Q271	31	Cluster: Putative outer membrane protein
UniRef50_A0A139TMK0|UniRef90_A0A2N8IQ33	29	Cluster: Cupin domain-containing protein
UniRef50_A0A2N8IZU4|UniRef90_A0A2N8IZU4	27	**
UniRef50_A0A2N8IQ28|UniRef90_A0A2N8IQ28	26	Cluster: Uncharacterized protein
UniRef50_A0A2N8IQ28|UniRef90_UPI000C9BAE36	26	**
UniRef50_A5ZBF1|UniRef90_A5ZBF1	26	Cluster: Thiol:disulfide interchange protein
UniRef50_A0A174RED8|UniRef90_A0A174MUD4	24	Cluster: Uncharacterized protein
UniRef50_A0A2N8IV97|UniRef90_A0A2N8IPZ5	24	Cluster: Uncharacterized protein
UniRef50_E5VBD1|UniRef90_E5VBD1	24	Cluster: RNA polymerase sigma-70 factor
UniRef50_Q89ZX0|UniRef90_Q89ZX0	24	Cluster: Alpha-1,3-galactosidase B
UniRef50_UPI000C9B126E|UniRef90_UPI000C9B126E	24	**
UniRef50_A0A2N8IIN9|UniRef90_A0A2N8IQ05	23	Cluster: Uncharacterized protein
UniRef50_A0A2N8IQ12|UniRef90_A0A2N8IQ12	23	Cluster: Uncharacterized protein
UniRef50_B2UQL3|UniRef90_B2UQL3	23	Cluster: Uncharacterized protein
UniRef50_R6J5L0|UniRef90_A0A3F3K680	22	**
UniRef50_R6JXA2|UniRef90_R6JXA2	22	Cluster: PEP-CTERM sorting domain-containing protein
UniRef50_UPI0005A92C89|UniRef90_UPI0005A92C89	22	**
UniRef50_A0A2N8IZ76|UniRef90_A0A2N8IZ76	21	**
UniRef50_A0A3F3K685|UniRef90_A0A3F3K685	20	**
UniRef50_L0FVN8|UniRef90_A0A1Y3VCK0	20	Cluster: RagB/SusD family nutrient uptake outer membrane protein
UniRef50_R6KJU1|UniRef90_R5UG18	20	Cluster: Lactase
UniRef50_R6JC81|UniRef90_A0A2N8HJX0	19	Cluster: Uncharacterized protein
UniRef50_UPI000E7DCDA9|UniRef90_UPI000E7DCDA9	19	**
UniRef50_C4Z8W9|UniRef90_F3PL09	18	Cluster: 2-C-methyl-D-erythritol 2,4-cyclodiphosphate synthase
UniRef50_I8VEA5|UniRef90_A0A0P0FQ36	18	Cluster: FecR family protein
UniRef50_R5FCQ4|UniRef90_B0NW93	17	Cluster: Porin O-and P-like phosphate-selective protein
UniRef50_A0A2N8IZD8|UniRef90_A0A2N8I935	16	Cluster: Autotransporter domain-containing protein
UniRef50_A7V6B0|UniRef90_A7V6B0	16	Cluster: Uncharacterized protein
UniRef50_A0A2N8IXD0|UniRef90_A0A2N8IXD0	15	**
UniRef50_E0NTL9|UniRef90_A5ZF36	15	Cluster: WbqC family protein
UniRef50_A0A139TP80|UniRef90_A0A2N8HDX4	14	Cluster: Alpha-L-fucosidase
UniRef50_A0A2N8HY50|UniRef90_A0A2N8HY50	14	Cluster: Uncharacterized protein
UniRef50_A0A2N8IQV3|UniRef90_A0A2N8IQV3	14	Cluster: Uncharacterized protein
UniRef50_R6STU5|UniRef90_A0A3E4FXD5	14	Cluster: DUF3823 domain-containing protein
UniRef50_A0A139TMG2|UniRef90_A0A2N8HXF6	12	Cluster: Cytochrome C
UniRef50_B0NW81|UniRef90_B0NW81	12	Cluster: Hydrolase
UniRef50_E5CH74|UniRef90_A0A0N7I9B4	12	Cluster: Arylsulfatase
UniRef50_Q5LGW9|UniRef90_Q89ZW9	12	Cluster: Glycosyl hydrolase family 109 protein 2
UniRef50_A0A178IP58|UniRef90_A0A174T0R8	11	Cluster: N-sulfoglucosamine sulfohydrolase
UniRef50_A0A139TQC2|UniRef90_A0A2N8HBC4	10	Cluster: Uncharacterized protein
UniRef50_R6J4Z3|UniRef90_R7E5P2	10	Cluster: Uncharacterized protein
UniRef50_A0A2N8IQ27|UniRef90_A0A2N8IQ27	9	Cluster: Uncharacterized protein
UniRef50_UPI000BDED86F|UniRef90_UPI000BDED86F	9	**
UniRef50_UPI000C9B77D2|UniRef90_UPI000C9B77D2	9	**
UniRef50_A0A2N8HZ87|UniRef90_A0A2N8HDV2	8	Cluster: Bifunctional chorismate mutase/prephenate dehydratase
UniRef50_R5MCK3|UniRef90_W6PL08	8	Cluster: Uncharacterized protein
UniRef50_A0A139TMG2|UniRef90_A0A2N8HBA9	7	Cluster: Cytochrome C
UniRef50_A0A2N8HY00|UniRef90_A0A2N8HY00	7	Cluster: YkuD domain-containing protein
UniRef50_A0A2N8HY16|UniRef90_A0A2N8HY16	7	Cluster: Uncharacterized protein
UniRef50_A0A3E5BPS8|UniRef90_A0A3E5BPS8	7	**
UniRef50_A0A2N8IJ00|UniRef90_A0A2N8IJ00	6	Cluster: Uncharacterized protein
UniRef50_A0A139TPG0|UniRef90_B2UL59	5	Cluster: NUDIX hydrolase
UniRef50_A0A139TU14|UniRef90_A0A2N8HJP5	5	Cluster: Uncharacterized protein
UniRef50_A0A174R7Q3|UniRef90_A0A174R7Q3	5	Cluster: Uncharacterized protein
UniRef50_A0A2N8HDV7|UniRef90_A0A354EAL4	5	Cluster: SGNH_hydro domain-containing protein
UniRef50_A0A2N8HG12|UniRef90_B2URF1	5	Cluster: N-acetylmuramoyl-L-alanine amidase family 2
UniRef50_A0A2N8HY00|UniRef90_A0A2N8HAK3	5	Cluster: YkuD domain-containing protein
UniRef50_A0A3E5HRG0|UniRef90_A0A3E5HRG0	5	Cluster: Uncharacterized protein
UniRef50_D4TEM3|UniRef90_A0A2N8HAM1	5	Cluster: Peptidase U32
UniRef50_UPI000C9B68C4|UniRef90_UPI000C9B68C4	5	**
UniRef50_A0A1C7PBW4|UniRef90_A0A2N8HDU3	4	Cluster: GTP cyclohydrolase 1 type 2
UniRef50_A0A2N8HK23|UniRef90_A0A2N8HK23	4	Cluster: TonB_C domain-containing protein
UniRef50_A0A2N8IQ25|UniRef90_A0A2N8HAM6	4	Cluster: Ribonuclease R
UniRef50_A7V661|UniRef90_A7V661	4	Cluster: Uncharacterized protein
UniRef50_B2UL71|UniRef90_B2UL71	4	Cluster: Uncharacterized protein
UniRef50_R6MAF9|UniRef90_A0A108T6B8	4	**
UniRef50_UPI000C9BF157|UniRef90_UPI000C9BF157	4	Cluster: hypothetical protein
UniRef50_UPI000C9C6ED4|UniRef90_UPI000C9C6ED4	4	Cluster: hypothetical protein
UniRef50_UPI000C9C79B7|UniRef90_UPI000C9C79B7	4	**
UniRef50_UPI000C9D1F45|UniRef90_UPI000C9D1F45	4	**
UniRef50_A0A2N8HK00|UniRef90_A0A2N8HK00	3	Cluster: Uncharacterized protein
UniRef50_A0A2N8I791|UniRef90_UPI000C9B58EC	3	**
UniRef50_A0A2N8IZ99|UniRef90_A0A2N8IZ99	3	**
UniRef50_A0A3E4I981|UniRef90_A0A3E4I981	3	Cluster: Uncharacterized protein
UniRef50_A7V675|UniRef90_A7V675	3	Cluster: Uncharacterized protein
UniRef50_B2UL69|UniRef90_A0A2N8HU86	3	**
UniRef50_A0A139TQC2|UniRef90_A0A2N8IB27	2	Cluster: Uncharacterized protein
UniRef50_A0A2N8HK23|UniRef90_A0A2N8HBC2	2	Cluster: TonB_C domain-containing protein
UniRef50_A0A2N8IIP8|UniRef90_A0A2N8IIP8	2	**
UniRef50_A5ZF31|UniRef90_A5ZF31	2	Cluster: Peptidase M60 domain-containing protein
UniRef50_L0G0Y4|UniRef90_I9UT59	2	Cluster: SusC/RagA family TonB-linked outer membrane protein
UniRef50_A0A078S0E6|UniRef90_A0A078S0E6	1	Cluster: Uncharacterized protein
UniRef50_A0A0E2TN35|UniRef90_A0A139JSB1	1	Cluster: Uncharacterized protein
UniRef50_A0A2N8HJW1|UniRef90_A0A2N8HVY6	1	**
UniRef50_A0A2N8HY05|UniRef90_A0A2N8HY05	1	Cluster: Uncharacterized protein
UniRef50_A0A2N8I944|UniRef90_A0A2N8I944	1	Cluster: Uncharacterized protein
UniRef50_A0A2N8IZ90|UniRef90_UPI000C9C2941	1	**
UniRef50_A0A396CTN0|UniRef90_A0A396CTN0	1	**
UniRef50_A0A3F3KBL4|UniRef90_A0A355VHP5	1	Cluster: Uncharacterized protein
UniRef50_R7DU72|UniRef90_A0A2N8HKD2	1	Cluster: Orotidine 5'-phosphate decarboxylase
UniRef50_R7DXH9|UniRef90_R7DXH9	1	Cluster: Uncharacterized protein
UniRef50_UPI000C9AA7E6|UniRef90_UPI000C9AA7E6	1	**
